# Supplementary material for: Use of ensiled biomass sorghum increases ionic liquid pretreatment efficiency and reduces biofuel production cost and carbon footprint
Source: Royal Society of Chemistry journal article supplement (doi:10.1039/d0gc03260c), 2021-01-01
Supplement: d0gc03260c1.pdf [file d0gc03260c1.pdf]

## Electronic Supplementary Information

### **Use of Ensiled Biomass Sorghum Increases Ionic Liquid Pretreatment Efficiency and Reduces Biofuel Production Cost and Carbon Footprint**

Harsha D. Magurudeniya<sup>a,b</sup>, Nawa Raj Baral<sup>a,c</sup>, Alberto Rodriguez<sup>a,b</sup>, Corinne D. Scown<sup>a,c</sup>, Jeff Dahlberg<sup>a,d</sup>, Daniel Putnam<sup>a,e</sup>, Anthe George<sup>a,b</sup>, Blake A. Simmons<sup>a,c</sup> and John M. Gladden<sup>\*a,b</sup>

<sup>a</sup> Joint BioEnergy Institute, Lawrence Berkeley National Laboratory, 5885 Hollis St, Emeryville, CA 94608, USA

<sup>b</sup> Sandia National Laboratories, 7011 East Ave, Livermore, CA 94551, USA

<sup>c</sup> Biological Systems and Engineering Division, Lawrence Berkeley National Laboratory, Berkeley, CA 94720, USA

<sup>d</sup> UC-ANR Kearney Agricultural Research and Extension Center, Parlier, CA, USA

<sup>e</sup> Department of Plant Sciences MS #1, University of California, 1 Shields Avenue, Davis, CA, USA

## S1. Data inputs used to model ensiled and dry biomass sorghum bale supply systems

Table S1. Primary nutrients for biomass sorghum and their prices (the same parameters are used for dry and ensiled biomass supply system systems)

| Parameter                           | Unit  | $\mu$      | a     | b      | $\sigma$   | Probability distribution |
|-------------------------------------|-------|------------|-------|--------|------------|--------------------------|
| Nitrogen <sup>1-5</sup>             | kg/ha | 121.2<br>4 | 48.00 | 217.00 | 51.88      | Triangular               |
| Phosphorus <sup>1,3,5</sup>         | kg/ha | 23.89      | 9.30  | 67.25  | 16.74      | Triangular               |
| Potassium <sup>1,3,5</sup>          | kg/ha | 168.0<br>9 | 20.00 | 293.66 | 100.5<br>3 | Triangular               |
| Price of nitrogen <sup>6-10</sup>   | \$/kg | 1.06       | 0.60  | 1.40   | 0.34       | Triangular               |
| Price of phosphorus <sup>6-10</sup> | \$/kg | 1.01       | 0.82  | 1.20   | 0.15       | Triangular               |
| Price of potassium <sup>6-10</sup>  | \$/kg | 1.09       | 0.91  | 1.26   | 0.14       | Triangular               |
| Herbicides <sup>11-13</sup>         | kg/ha | 3.13       | 1.79  | 5.60   | -          | Triangular               |
| Herbicides <sup>11-14</sup>         | \$/ha | 62.12      | 24.46 | 111.20 | -          | Triangular               |

Note:  $\mu$  = average value; a = minimum value; b = maximum value;  $\sigma$  = standard deviation

Table S2. Operating data and purchasing price for forage harvester (for the ensiled biomass supply system)

| Parameter                                  | Unit    | $\mu$   | a       | b       | $\sigma$ | Probability distribution |
|--------------------------------------------|---------|---------|---------|---------|----------|--------------------------|
| <b>Forage harvester</b>                    |         |         |         |         |          |                          |
| Productivity <sup>15-17</sup>              | t/h     | 31.67   | 26.33   | 49.22   | 10.45    | Triangular               |
| Field efficiency <sup>15,16,18</sup>       | %       | 76.43   | 60.00   | 90.00   | 9.88     | Triangular               |
| Fuel consumption <sup>16</sup>             | L/h     | 61.61   | 28.62   | 104.15  | 26.85    | Triangular               |
| Labor rate <sup>19</sup>                   | \$/h    | 19.36   | 12.62   | 29.81   | 6.82     | Triangular               |
| Wagon unloading time <sup>15,16</sup>      | h       | 0.03    | 0.02    | 0.05    | 0.02     | Triangular               |
| Purchasing price <sup>15,16,20-22</sup>    | \$/unit | 230,570 | 179,334 | 259,725 | 30,710   | Triangular               |
| Repair and maintenance <sup>15,16,18</sup> | %       | 7.36    | 5.57    | 10.14   | -        | Triangular               |
| Service life <sup>15,16,18</sup>           | yr      | 4.50    | 4.00    | 5.00    | -        | Constant                 |
| Salvage value <sup>15,16,18</sup>          | %       | 18.60   | 15.00   | 25.00   | -        | Constant                 |
| Material loss <sup>15,17</sup>             | %       | 6.00    | 2.00    | 10.00   | -        | Triangular               |

Note:  $\mu$  = average value; a = minimum value; b = maximum value;  $\sigma$  = standard deviation

Table S3. Operating data and purchasing price for windrower and windrow turner (only for dry biomass supply system)

| Parameter                                  | Unit    | $\mu$  | a      | b      | $\sigma$ | Probability distribution |
|--------------------------------------------|---------|--------|--------|--------|----------|--------------------------|
| <b>Windrower</b>                           |         |        |        |        |          |                          |
| Productivity <sup>15,16,23</sup>           | t/h     | 32.39  | 19.63  | 54.14  | 13.38    | Triangular               |
| Field efficiency <sup>15,16,23</sup>       | %       | 75.00  | 50.00  | 90.00  | 12.91    | Triangular               |
| Fuel consumption <sup>15,16,23</sup>       | L/h     | 25.06  | 18.90  | 34.10  | 6.87     | Triangular               |
| Labor rate <sup>19</sup>                   | \$/h    | 19.36  | 12.62  | 29.81  | 6.82     | Triangular               |
| Purchasing price <sup>15,16,23</sup>       | \$/unit | 48,691 | 23,000 | 83,096 | 23,234   | Triangular               |
| Repair and maintenance <sup>15,16</sup>    | %       | 27.50  | 7.50   | 48.00  | 20.25    | Triangular               |
| Service life <sup>15,16</sup>              | yr      | 4.50   | 4.00   | 5.00   | 0.71     | Constant                 |
| Salvage value <sup>15,16</sup>             | %       | 19.72  | 15.00  | 25.00  | 4.12     | Constant                 |
| <b>Windrow turner/raking</b>               |         |        |        |        |          |                          |
| Productivity <sup>15,16</sup>              | t/h     | 64.78  | 2.64   | 108.27 | 26.76    | Triangular               |
| Field efficiency <sup>15,16</sup>          | %       | 75.00  | 50.00  | 90.00  | 12.91    | Triangular               |
| Fuel consumption <sup>15,16</sup>          | L/h     | 9.12   | 7.56   | 11.34  | 1.97     | Triangular               |
| Labor rate <sup>19</sup>                   | \$/h    | 19.36  | 12.62  | 29.81  | 6.82     | Triangular               |
| Purchasing price per unit <sup>15,16</sup> | \$      | 37,876 | 37,103 | 38,649 | 1,093    | Triangular               |
| Repair and maintenance <sup>15,16</sup>    | %       | 7.36   | 5.57   | 10.14  | 2.00     | Triangular               |
| Service life <sup>15,16</sup>              | yr      | 6.25   | 5.00   | 7.50   | 1.77     | Constant                 |
| Salvage value <sup>15,16</sup>             | %       | 12.30  | 5.00   | 24.00  | 8.19     | Constant                 |

Note:  $\mu$  = average value; a = minimum value; b = maximum value;  $\sigma$  = standard deviation

Table S4. Operating data and purchasing price of baler and stacker (Only for dry biomass supply system)

| Parameter                          | Unit    | $\mu$   | a      | b       | $\sigma$ | Probability distribution |
|------------------------------------|---------|---------|--------|---------|----------|--------------------------|
| <b>Baler</b> <sup>16,23,24</sup>   |         |         |        |         |          |                          |
| Productivity                       | t/h     | 25.91   | 20.00  | 43.31   | 10.70    | Triangular               |
| Field efficiency                   | %       | 66.29   | 35.00  | 90.00   | 19.36    | Triangular               |
| Fuel consumption                   | L/h     | 33.50   | 18.90  | 53.00   | 12.84    | Triangular               |
| Labor rate                         | \$/h    | 20.11   | 12.62  | 29.81   | 7.18     | Triangular               |
| Consumable: string                 | m/bale  | 38.00   | 38.00  | 38.00   | -        | Constant                 |
| Cost of consumable string          | \$/m    | 0.02    | 0.02   | 0.02    | 0.00     | Constant                 |
| Purchasing price                   | \$/unit | 109,531 | 87,700 | 135,000 | 17,986   | Triangular               |
| Repair and maintenance             | %       | 20.00   | 5.00   | 35.00   | 21.21    | Triangular               |
| Service life                       | year    | 6.00    | 5.00   | 7.00    | 1.41     | Constant                 |
| Salvage value                      | %       | 22.50   | 20.00  | 25.00   | 3.54     | Constant                 |
| <b>Stacker</b> <sup>16,23,24</sup> |         |         |        |         |          |                          |
| Productivity                       | bales/h | 65.00   | 50.00  | 80.00   | 10.64    | Triangular               |
| Field efficiency                   | %       | 87.00   | 70.00  | 97.00   | 10.20    | Triangular               |
| Fuel consumption                   | L/h     | 21.17   | 8.47   | 37.90   | 12.00    | Triangular               |
| Labor rate                         | \$/h    | 20.11   | 12.62  | 29.81   | 7.18     | Triangular               |
| Purchasing price                   | \$/unit | 79,967  | 70,000 | 90,000  | 10,000   | Triangular               |
| Repair and maintenance             | %       | 26.17   | 3.33   | 49.00   | 32.29    | Triangular               |
| Service life                       | year    | 5.00    | 5.00   | 5.00    | -        | Constant                 |
| Salvage value                      | %       | 10.00   | 5.00   | 15.00   | 7.07     | Constant                 |

Note:  $\mu$  = average value; a = minimum value; b = maximum value;  $\sigma$  = standard deviation

### S1.1 Transportation of chopped biomass and bale

The harvested biomass in the form of chopped biomass and bales are transported directly from the field to the biorefinery. This transportation operation includes loading at the field edge, transportation via truck, and unloading at the biorefinery. The chopped biomass is directly loaded on the truck by the forage harvester, therefore, the loading operation at the field is excluded. However, all the loading, transportation, and unloading operations associated with the feedstock transportation are included to transport bales, which are consistent with previous studies.<sup>23,24</sup> Briefly, squeeze bale loader is used to load and unload the bales. A group of people conducts these loading and unloading operations. For each group, two squeeze bale loaders (one at each end) and 4 trucks<sup>25</sup> are assigned. Each truck can carry as much as 36 bales/trip due to the size limit. We consider a box truck with a capacity of 133.8 m<sup>3</sup> to transport chopped biomass<sup>16</sup> where the maximum payload is assumed to be 22.7 t. Table S5 summarizes the operating data associated with feedstock transportation. The detailed methods for estimation of resources and cost for feedstock transportation are available elsewhere.<sup>24,26,27</sup>

Table S5. Operating data associated with the feedstock transportation operation

| Parameter                                                            | Unit    | $\mu$   | <b>a</b> | <b>b</b> | $\sigma$ | Probability distribution |
|----------------------------------------------------------------------|---------|---------|----------|----------|----------|--------------------------|
| <b>Truck</b>                                                         |         |         |          |          |          |                          |
| Purchasing price <sup>16,28</sup>                                    | \$/unit | 140,000 | 130,000  | 150,000  | -        | Triangular               |
| Labor cost <sup>19</sup>                                             | \$/h    | 20.83   | 12.94    | 30.36    | 6.95     | Triangular               |
| Fuel consumption <sup>24</sup>                                       | L/km    | 0.43    | 0.35     | 0.50     | 0.06     | Triangular               |
| Diesel price <sup>29</sup>                                           | \$/L    | 0.88    | 0.61     | 1.05     | 0.18     | Lognormal                |
| <b>Loader for bale</b>                                               |         |         |          |          |          |                          |
| Purchasing price <sup>16</sup>                                       | \$/unit | 30,000  | 20,000   | 40,000   | -        | Triangular               |
| Labor cost <sup>19</sup>                                             | \$/h    | 19.36   | 12.62    | 29.81    | 6.82     | Triangular               |
| Fuel consumption <sup>24</sup>                                       | L/h     | 20.80   | 17.00    | 24.60    | 5.70     | Triangular               |
| Loading time <sup>24</sup>                                           | h       | 0.63    | 0.33     | 0.95     | 0.31     | Triangular               |
| Unloading time <sup>Φ24</sup>                                        | h       | 0.49    | 0.17     | 1.49     | 0.58     | Triangular               |
| <b>Storage or biorefinery transport for chopped biomass and bale</b> |         |         |          |          |          |                          |
| Working days <sup>30</sup>                                           | days/yr | 31.54   | 15.00    | 75.00    | 14.59    | Triangular               |
| Working hours <sup>λ</sup>                                           | h/day   | 16.00   | 8.00     | 24.00    | 8.00     | Triangular               |

Note:  $\mu$  = average value; **a** = minimum value; **b** = maximum value;  $\sigma$  = standard deviation

<sup>Φ</sup>The same unloading (includes unloading and waiting time) time is considered for the chopped biomass.

<sup>λ</sup>Assumed based on the current harvesting practices of biomass sorghum.

## S1.2 Feedstock storage at the biorefinery

Different storage methods for the chopped biomass and bale are used at the biorefinery. The chopped biomass is ensiled in a bunker silo, which is covered by the tarp.<sup>18</sup> This ensiling process creates an anaerobic environment, which prevents degradation of the quality of biomass.<sup>15</sup> Bale (contains <20% moisture) are stored in open space under the tarp. Gravels are laid on the floor to protect bales and module from moisture seepage from ground. Detailed methods to estimate the storage cost is provided in the previous studies.<sup>18,23,24</sup>

## S2. Determination of minimum selling price and greenhouse gas footprint

The capital and operating costs obtained from the process model are used to determine the minimum price of the selected biofuels considering the internal rate of return (IRR) after taxes of 10%, plant lifetime of 30 years, plant operating hours of 7920 h (330 days/year and 24 h/day), and income tax of 35%.<sup>22</sup> Other economic evaluation parameters are consistent with previous technoeconomic studies.<sup>20,22</sup> On the other hand, the material and energy data obtained from the process model are used to quantify the carbon footprint. We use previously developed life cycle assessment model, which computes the GHG emissions considering the input-output matrix for all relevant direct and indirect inputs/outputs and the GHG impact vectors gathered from widely used LCA databases, including GREET developed by Argonne National Laboratory, and U.S. Life Cycle Inventory Database.<sup>21</sup> The modeled biorefinery generates sufficient process heat and

electricity to meet the facility requirement. The GHG emissions credit from onsite electricity is determined considering the displacement of the same amount of grid electricity (U.S. electricity mix). We consider higher heating values of ethanol the functional unit of 1 MJ.

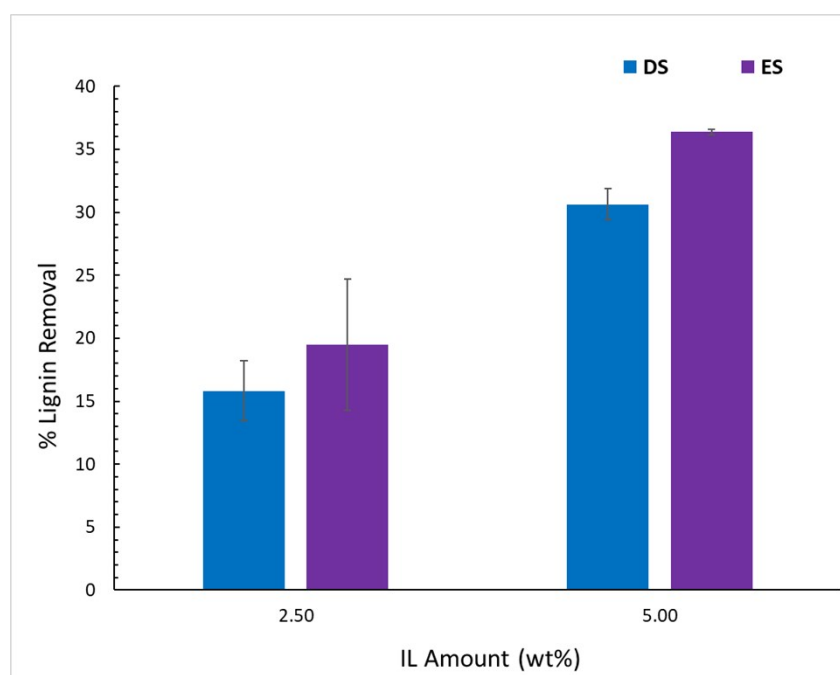

**Figure S1.** Lignin removal of ES and DS biomass during the IL pretreatment. The IL loading rates are 2.5, and 5 wt% based on the whole slurry.

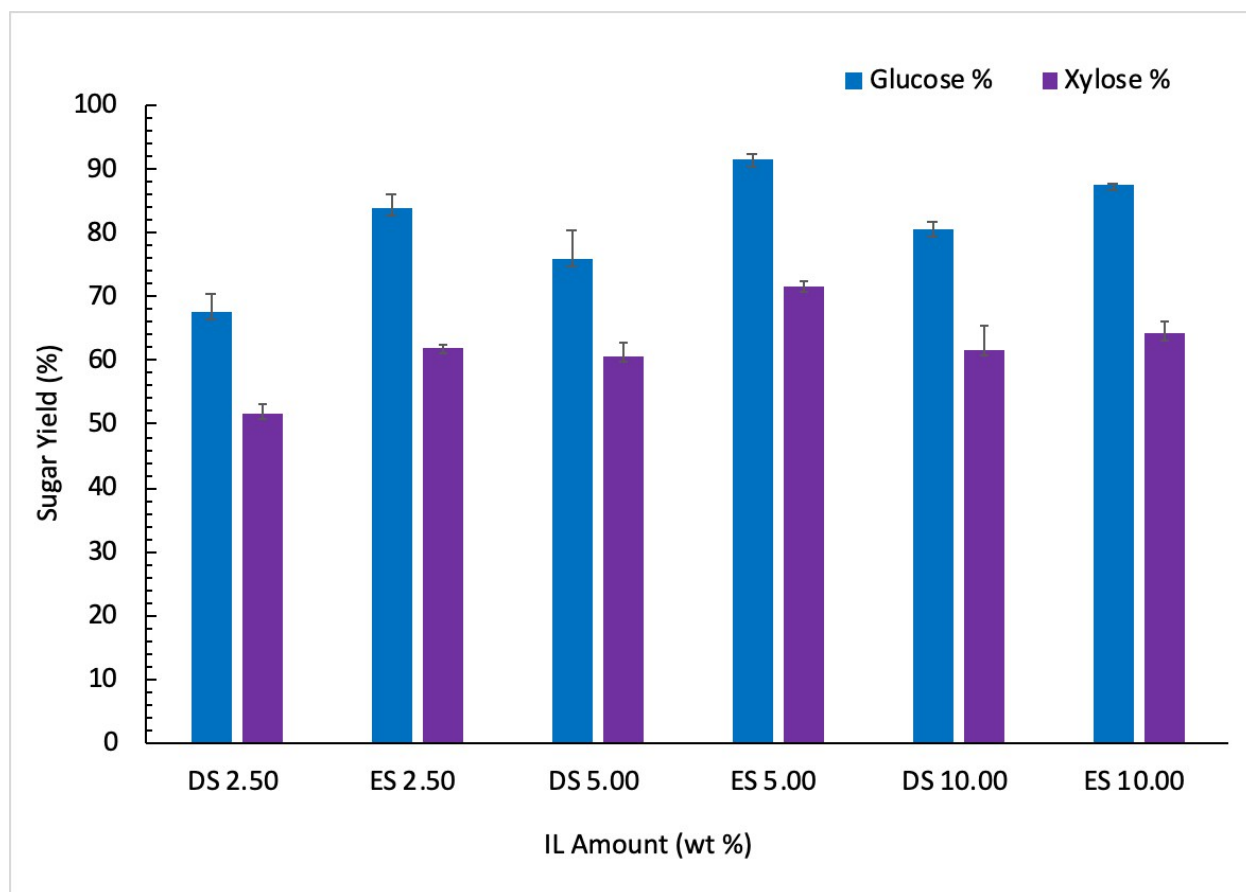

**Figure S2.** Glucose and xylose yields obtained by performing a one-pot IL process utilizing the ES and DS biomass. The IL loading rates are 2.5, 5, and 10 wt% based on the whole slurry.

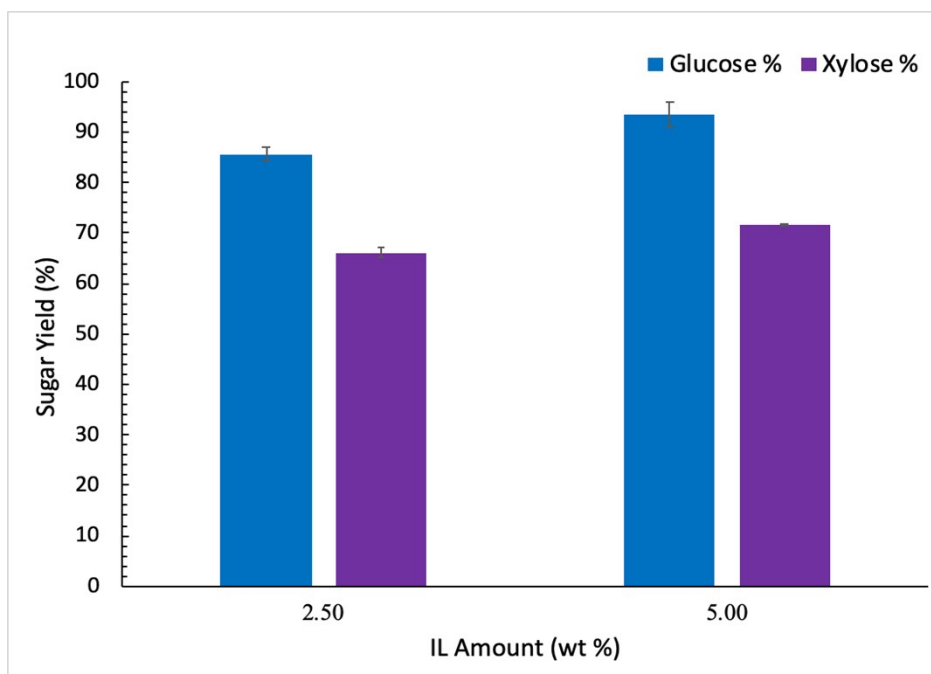

**Figure S3.** Glucose and xylose yields obtained by performing a one-pot IL process utilizing the ES in Parr reactor at 140 °C. The IL loading rates are 2.5 and 5 wt% based on the whole slurry.

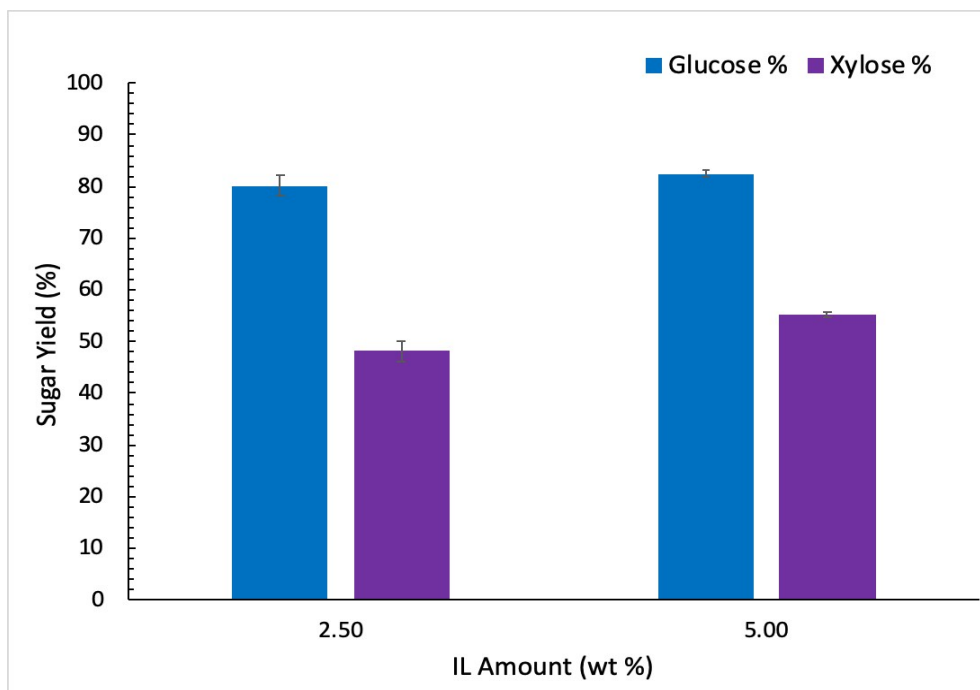

**Figure S4.** Glucose and xylose yields obtained by performing a one-pot IL process of ES at 95 °C. The IL loading rates are 2.5 and 5 wt% based on the whole slurry.



## References

- 1 J. Williams, J. Brammer, R. Llewelyn and J. Bergtold, *J. ASFMRA*, 2016, 1–28.
- 2 W. L. Rooney, J. Blumenthal, B. Bean and J. E. Mullet, *Biofuels, Bioprod. Biorefining*, 2007, **1**, 147–157.
- 3 J. A. Linton, J. C. Miller, R. D. Little, D. R. Petrolia and K. H. Coble, *Biomass and bioenergy*, 2011, **35**, 3050–3057.
- 4 W. Zegada-Lizarazu and A. Monti, *Biomass and Bioenergy*, 2012, **40**, 1–12.
- 5 M. H. Langholtz, B. J. Stokes and L. M. Eaton, *Oak Ridge Natl. Lab. Oak Ridge, Tennessee, Manag. by UT-Battelle, LLC US Dep. Energy*, 2016, **2016**, 1–411.
- 6 R. L. Hoskinson, D. L. Karlen, S. J. Birrell, C. W. Radtke and W. W. Wilhelm, *Biomass and Bioenergy*, 2007, **31**, 126–136.
- 7 J. M. F. Johnson, W. W. Wilhelm, D. L. Karlen, D. W. Archer, B. Wienhold, D. T. Lightle, D. Laird, J. Baker, T. E. Ochsner and J. M. Novak, *BioEnergy Res.*, 2010, **3**, 342–352.
- 8 N. Kaliyan, R. V. Morey and D. G. Tiffany, *BioEnergy Res.*, 2015, **8**, 1433–1448.
- 9 R. V. Morey, N. Kaliyan, D. G. Tiffany and D. R. Schmidt, *Appl. Eng. Agric.*, 2010, **26**, 455–461.
- 10 L. Tao, E. C. D. Tan, R. McCormick, M. Zhang, A. Aden, X. He and B. T. Zigler, *Biofuels, Bioprod. Biorefining*, 2014, **8**, 30–48.
- 11 A. S. Bennett and R. P. Anex, *Trans. ASABE*, 2008, **51**, 603–613.
- 12 S. Amosson, J. Girase, B. Bean, W. Rooney and J. Becker, *Agrilife Res*; <http://amarillo.tamu.edu/files/2011/05/Biomass-Sorghum.pdf> (accessed March 5, 2020).
- 13 R. G. Bowling, T. L. McKinley and E. L. Rawls, *Univ. Tennessee PB1658*, 2006, 1–74; <https://extension.tennessee.edu/publications/Documents/PB1658.pdf> (accessed January 22, 2020).
- 14 UCCE. Sample Costs to Produce Sorghum Silage. University of California Cooperative Extension Agriculture and Natural Resources, Agricultural Issues Center, 2016; [https://coststudyfiles.ucdavis.edu/uploads/cs\\_public/c2/a9/c2a9d0ea-f089-48a9-a9b2-64ec58355b46/2016sorghumsilagesjvfinaldraftmar23.pdf](https://coststudyfiles.ucdavis.edu/uploads/cs_public/c2/a9/c2a9d0ea-f089-48a9-a9b2-64ec58355b46/2016sorghumsilagesjvfinaldraftmar23.pdf) (accessed Dec 30, 2019).
- 15 H. An and S. W. Searcy, *Biomass and Bioenergy*, 2012, **46**, 190–202.
- 16 J. Butler, M. Downing and A. Turhollow, *Forage Harvest and Transport Costs*, Oak Ridge National Lab., TN (US), 1998; <https://www.osti.gov/servlets/purl/5842> (accessed January 1, 2020).
- 17 A. Turhollow, *Biomass and Bioenergy*, 1994, **6**, 229–241.
- 18 ORNL, *Cost Methodology for Biomass Feedstocks: Herbaceous Crops and Agricultural*

- Residues*, 2009;  
<https://pdfs.semanticscholar.org/3f28/acdffb5d254d9a31ce6ccfee66afd0abfb0a.pdf>  
(accessed Dec 31, 2019).
- 19 DOL, Occupational Employment Statistics. U.S. Department of Labor, 2018;  
<https://www.bls.gov/oes/home.htm>.
  - 20 W. F. Lazarus, *Environ. Sci.*, 2014, **0**, 1–8.
  - 21 T. Lin, S. K. Mathanker, A. C. Hansen and K. C. Ting, *Trans. ASABE*, 2016, **59**, 1031–1039.
  - 22 H. W. Downs and R. W. Hansen, *Color. State Univ. Coop. Extension, Pub*, 1998, 9–11;  
[https://mountainscholar.org/bitstream/handle/10217/182996/AEXT\\_ucsu2062250061998.pdf?sequence=1&isAllowed=y](https://mountainscholar.org/bitstream/handle/10217/182996/AEXT_ucsu2062250061998.pdf?sequence=1&isAllowed=y).
  - 23 J. R. Hess, C. T. Wright, K. L. Kenney and E. M. Searcy, *Commodity-Scale Production of an Infrastructure-Compatible Bulk Solid from Herbaceous Lignocellulosic Biomass. Idaho Natl. Lab. Idaho Falls, ID 2009*;  
<https://bioenergy.inl.gov/Reports/Uniform%20Format%20Bioenergy%20Feedstock.pdf>  
(accessed March 10, 2020).
  - 24 N. R. Baral, C. Quiroz-Arita and T. H. Bradley, *Appl. Energy* 2017, **208**, 1343–1356.
  - 25 S. Gutesa, Using GIS and Intelligent Transportation Tools for Biomass Supply Chain. Master thesis, Iowa State University, 2013;  
<https://lib.dr.iastate.edu/cgi/viewcontent.cgi?article=4393&context=etd> (accessed March 10, 2020).
  - 26 J. R. Hess, K. L. Kenney, L. P. Ovard, E. M. Searcy and C. T. Wright, *Idaho Natl. Lab. Idaho Falls, ID*, 2009, **6**, 163.
  - 27 Idaho National Laboratory (INL). The Feedstock Logistics Design Case for Multiple Conversion Pathways. Idaho National Laboratory, Idaho Falls, ID, 2014;  
<https://bioenergy.inl.gov/Reports/Feedstock%20Supply%20System%20Design%20and%20Analysis.pdf> (accessed January 22, 2019).
  - 28 NYSERDA. New York State Electric Vehicle-Voucher Incentive Fund (NYSEV-VIF). 2018;  
<https://www.nyserda.ny.gov/All-Programs/Programs/Truck-Voucher-Program> (accessed January 22, 2019).
  - 29 EIA, Gasoline and Diesel Fuel Update, US Energy Information Administration, Washington, DC, 2018; <https://www.eia.gov/petroleum/gasdiesel/> (accessed January 22, 2019).
  - 30 U.S. Department of Agriculture. Usual Planting and Harvesting Dates for U.S. Field Crops. Agric. Handb. 1997; <https://usda.library.cornell.edu/concern/publications/vm40xr56k>.
